# Supplementary material
Source: PubMed Central journal article supplement (PMC9448011)
Supplement: JCOPDF-9-427-s001.pdf [file JCOPDF-9-427-s001.pdf]

## **Online Supplement**

### **High Prevalence of Suboptimal Peak Inspiratory Flow in Hospitalized Patients With COPD: A Real-world Study**

Donald A. Mahler, MD<sup>1,2</sup> Shaban Demirel, PhD<sup>3</sup> Ramon Hollander, MBA, RRT<sup>4</sup> Gokul Gopalan, MD, MPH<sup>5</sup> Asif Shaikh, MD<sup>5</sup> Cathy D. Mahler, PhD, MBA<sup>5</sup> Jessica Elder, PhD<sup>5</sup> Curtis Morrison, RRT<sup>4</sup>

<sup>1</sup>Geisel School of Medicine at Dartmouth, Hanover, New Hampshire, United States

<sup>2</sup>Valley Regional Hospital, Claremont, New Hampshire, United States

<sup>3</sup>Legacy Research Institute, Portland, Oregon, United States

<sup>4</sup>Legacy Salmon Creek Medical Center, Vancouver, Washington, United States

<sup>5</sup>Boehringer Ingelheim Pharmaceuticals, Incorporated, Ridgefield, Connecticut, United States

SUPPLEMENTARY TABLE S1. CATEGORIZATION OF DRY POWDER INHALERS BY INTERNAL RESISTANCE, SUBOPTIMAL PIF THRESHOLDS, AND OPTIMAL PIF THRESHOLDS

| <b><i>Inhaler internal resistance</i></b> | <b><i>Inhalers</i></b>                                                                            | <b><i>PIF threshold, L/min</i></b> |                      |
|-------------------------------------------|---------------------------------------------------------------------------------------------------|------------------------------------|----------------------|
|                                           |                                                                                                   | Suboptimal <sup>a</sup>            | Optimal <sup>a</sup> |
| <b>Low</b>                                | Neohaler <sup>®</sup>                                                                             | <60                                | ≥60                  |
| <b>Medium-low</b>                         | Diskus <sup>®</sup> , Ellipta <sup>®</sup>                                                        |                                    |                      |
| <b>Medium</b>                             | RespiClick <sup>®</sup> , Aerolizer <sup>®</sup> , Flexhaler <sup>®</sup> , Pressair <sup>®</sup> |                                    |                      |
| <b>Medium-high</b>                        | Twisthaler <sup>®</sup>                                                                           |                                    |                      |
| <b>High</b>                               | HandiHaler <sup>®</sup>                                                                           | <30                                | ≥30                  |

<sup>a</sup>Defined based on available reference materials.<sup>7-14</sup>

PIF, peak inspiratory flow.

**Supplementary Information: Peak inspiratory flow (PIF) assessment protocol  
(Supplementary figure. S1)**

- Before June 2018
  - Chronic obstructive pulmonary disease (COPD) educators visited patients with a primary or secondary diagnosis of COPD, regardless of admission diagnosis, when an inhaled medication refill was needed.
  - COPD educators opened a new inhaler and assessed PIF using the In-Check™ DIAL G16 set to the corresponding internal resistance of the inhaler the patient was using.
  - PIF was documented in the patient's electronic health record (EHR).
  - If patients failed to meet the minimum flow required for their prescribed dry powder inhaler (DPI), they were tested for an alternative DPI.
- June 2018 to present
  - Respiratory therapists visit patients with a primary or secondary diagnosis of COPD, regardless of admission diagnosis, as soon as possible after admission when patients are stable enough to perform a PIF assessment maneuver.
  - Respiratory therapists assess PIF using the In-Check™ DIAL G16 set to the corresponding internal resistance for that inhaler before opening any metered-dose inhaler/DPI.
  - PIF is documented in patients' EHRs.
  - If patients failed to meet the minimum flow required for their prescribed DPI, they were tested for an alternative DPI.
  - PIF protocol
    - COPD educators assessed PIF using the In-Check™ DIAL G16 set to the corresponding internal resistance for that inhaler.
    - Patients using a metered-dose inhaler or soft mist inhaler were coached not to exceed 30 L/min during assessment; therefore, PIFs could not be calculated because maximum inspiratory effort was not applied.

<sup>a</sup>Refer to the In-Check™ DIAL user manual for further details.<sup>27</sup>

DPI, dry powder inhaler; LSCMC, Legacy Salmon Creek Medical Center; PIF, peak inspiratory flow; pMDI, pressurized metered-dose inhaler.

## E-Figure-1

### ***LSCMC PIF protocol***

-  Patients were asked to use the In-Check™ DIAL the same way they would use their prescribed inhaler.
  - PIF was then measured for effective flow based on the manufacturer's recommendations.
-  Patients were asked to use the In-Check™ DIAL again after feedback and coaching.
  - Patients were asked to sit up straight if possible, fully exhale until they had no air to push out, and put the mouthpiece in their mouth and keep it level.
  - Patients received instructions on how to use their inhaler.
    - DPIs: breathe in as hard as possible for as long as possible, followed by a breath hold for as long as possible (minimum of 5 seconds; maximum of 10 seconds).
    - pMDIs or Respimat®: breathe in slowly and steadily, followed by a breath hold for 5 to 10 seconds if possible; patients were coached not to exceed 30 L/min.
-  PIF was then measured for effective flow based on the manufacturer's recommendations.
-  A color-coded list, with colors corresponding to the resistance settings reflective of manufacturer-recommended flow for each inhaler, was provided with each In-Check™ DIAL, which are available at each Pyxis<sup>a</sup>.
